# Supplementary material for: Fabrication of ZnO and TiO2 Nanotubes via Flexible Electro-Spun Nanofibers for Photocatalytic Applications
Source: MDPI journal article supplement (doi:10.3390/nano11051305), 2021-05-15
Supplement: s1 [file s1]

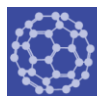

Supplementary Materials

# Fabrication of ZnO and TiO<sub>2</sub> Nanotubes via Flexible Electro-Spun Nanofibers for Photocatalytic Applications

Monica Enculescu <sup>\*,†</sup> Andreea Costas <sup>†</sup>, Alexandru Evanghelidis and Ionut Enculescu

Laboratory of Multifunctional Materials and Structures, National Institute of Materials Physics, Atomîștilor, 405 A, RO-077125 Magurele, Romania; andreea.costas@infim.ro (A.C.); alex.evangelidis@infim.ro (A.E.); encu@infim.ro (I.E.)

<sup>†</sup> Correspondence: authors contributed equally.

<sup>\*</sup> Correspondence: mdatcu@infim.ro

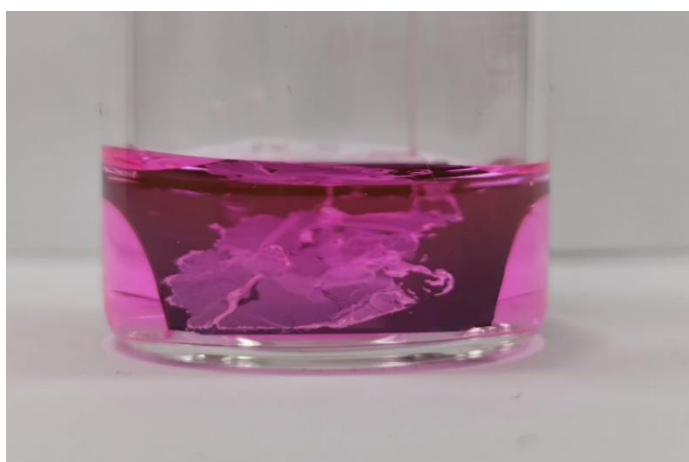

(a)

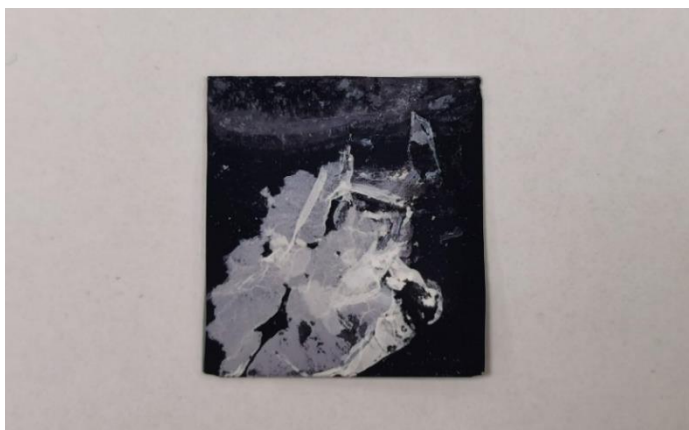

(b)

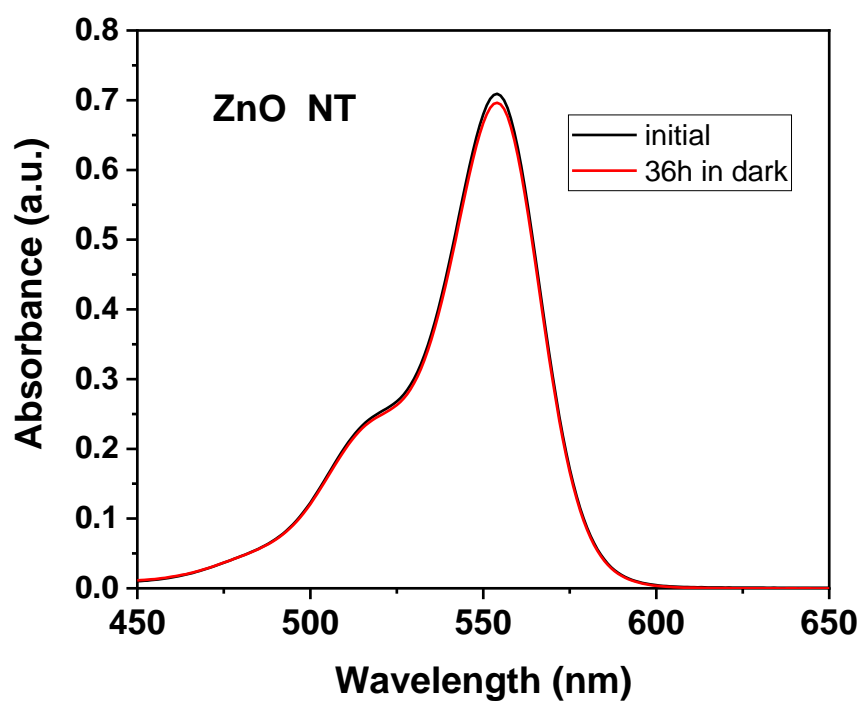

(c)

**Figure S1.** (a). ZnO NT inserted in Rhodamine B solution; (b). Sample of ZnO NT on Si substrate after removal from Rhodamine B solution in which was kept in dark for 36 h; (c). Initial and after 36 h spectra of Rhodamine B solution.
